# Supplementary material
Source: PubMed Central journal article supplement (PMC6338578)
Supplement: Supp_Fig1.pdf [file Supp_Fig1.pdf]

## Supplementary Data

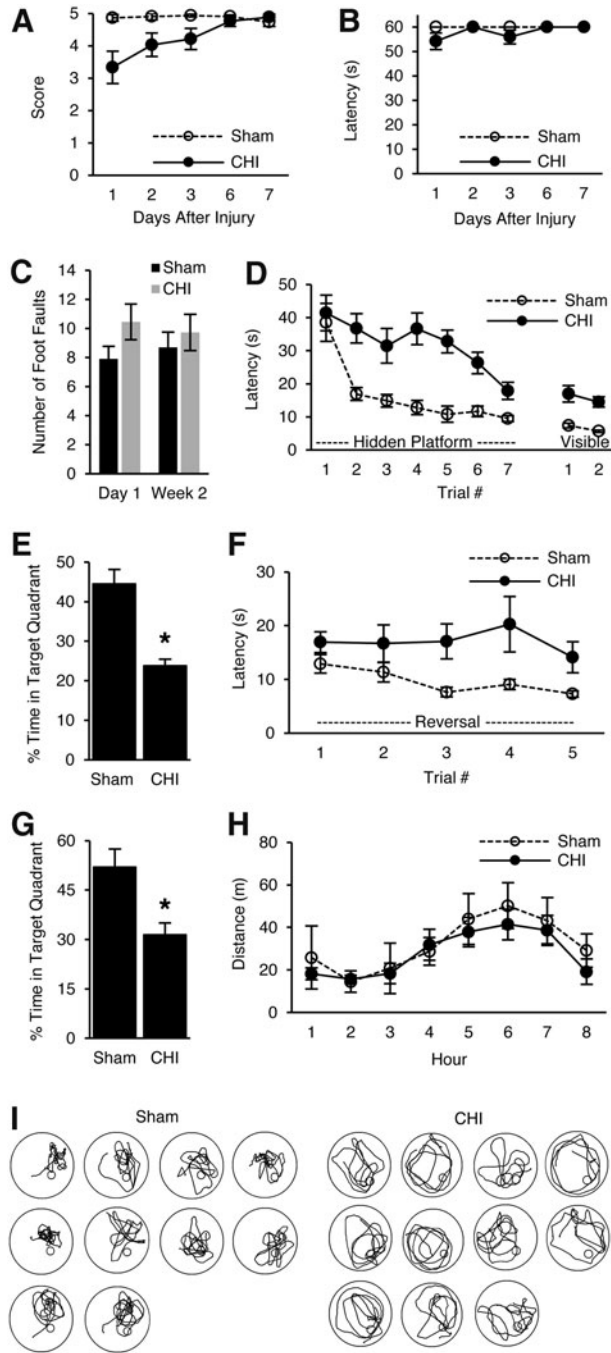

**SUPPLEMENTARY FIG. 1.** Motor and cognitive outcomes after sham ( $n=10$ ) or closed head injury (CHI;  $n=11$ ). Wire grip score (A) and latency (B) and number of foot faults (C) did not differ between sham and CHI. (D) CHI induced hidden and visible platform deficits ( $p<0.001$  for group for both) as well as probe trial deficits (E;  $*p<0.001$  vs. sham). (F) CHI induced deficits in reverse Morris water maze (MWM) hidden platform trials ( $p<0.05$  for group) and (G) probe trials ( $*p<0.01$ ). (H) Locomotor activity of sham and CHI mice did not differ in an open-field test assessed at 6 weeks after injury ( $p=ns$ ). (I) Swim patterns of sham and CHI mice after reverse MWM suggest a less spatial strategy post-CHI. Data are mean  $\pm$  SEM. ns, not significant; SEM, standard error of the mean.
