# Supplementary material
Source: PubMed Central journal article supplement (PMC6338578)
Supplement: Supp_Fig2.pdf [file Supp_Fig2.pdf]

---

**SUPPLEMENTARY FIG. 2.** Release of HMGB1 in mouse parietal cortex after controlled cortical impact (CCI), but not closed head injury (CHI). **(A)** HMGB1 (red) is released from cells after CCI. DAPI (blue) shows the nucleus. **(B)** Representative image of western blot showing decreased HMGB1 at 24 h after CCI.  $\beta$ -Actin is shown at 42 kDa and HMGB1 is shown at 25 kDa. **(C)** No change in total expression of HMGB1 in brain homogenates of cortex, hippocampus, or striatum at 24 ( $n = 5/\text{group}$ ) or 48 h ( $n = 3/\text{group}$ ) after CHI. A representative sham-injured and CCI mouse is shown for comparison. **(D)** Densitometry results for the data in panel (C). **(E)** Nuclear to cytosol translocation of HMGB1 at 24 and 48 h after CHI. Magnified image of the field outlined in white is shown below. HMGB1 antibody produced a single band on the western blot. Data are mean  $\pm$  SEM. DAPI, 4',6-diamidino-2-phenylindole; HMGB1, high mobility group box 1; SEM, standard error of the mean.

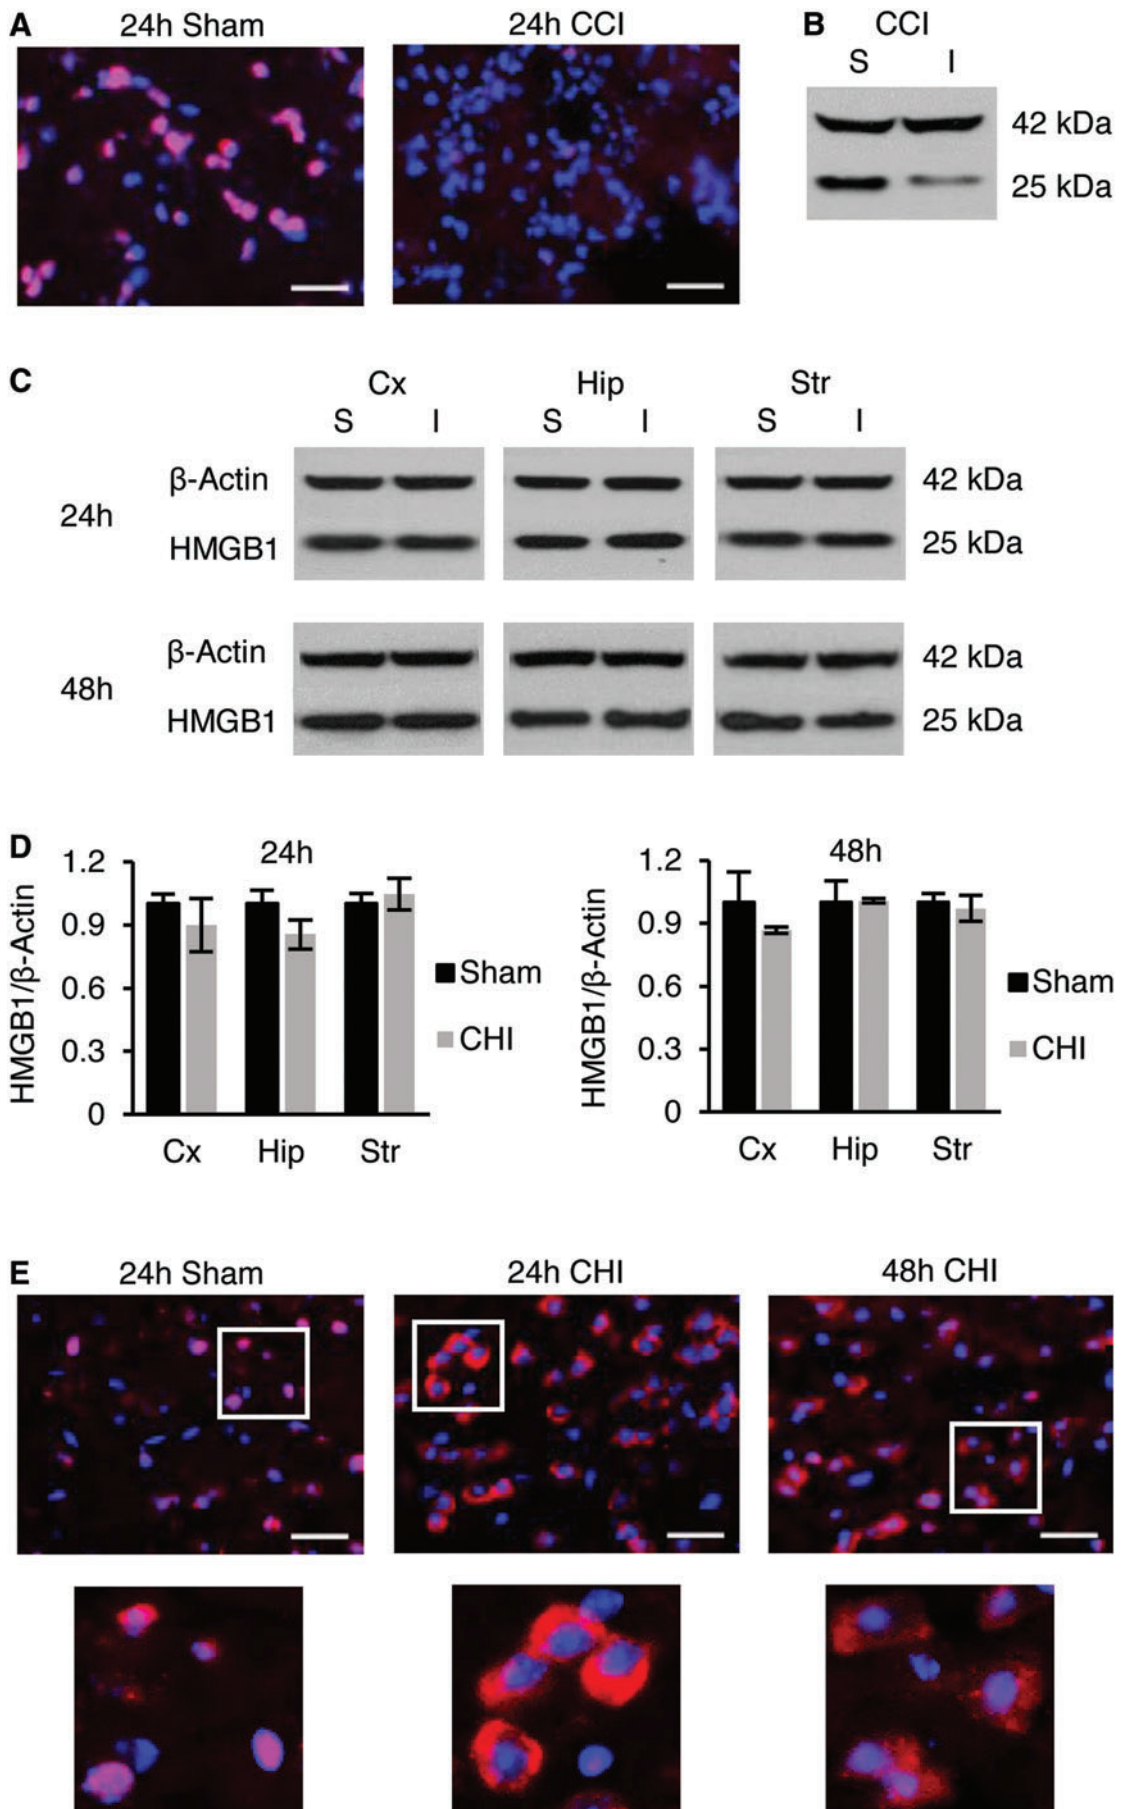

SUPPLEMENTARY FIG. 2.
